# Supplementary material
Source: publisher figshare collection journal article supplement (https://karger.figshare.com/ndownloader/files/12525740)
Supplement: Supplementary file 1 [file 12525740]

**Insights from the WHO and National lists of Essential Medicines:**

**Focus on Pediatric Diabetes Care in Africa**

Amanda Rowlandsab, BS, Emmanuel Ameyawbc, MD, Florent Rutagaramad, MD, Joel Dipesalemae, MD, Edna Siima Majaliwaf, MD, Joyce Mbogog, MD, Graham D Ogleh, MD, Jean-Pierre Chanoineab, MD

aEndocrinology and Diabetes Unit, British Columbia Children’s Hospital and University of British Columbia, Vancouver, BC, Canada, V6H 3V4

bGlobal Pediatric Endocrinology and Diabetes (GPED)

cKomfo Anokye Teaching Hospital, P.O. Box 1934, Kumasi, Ghana

dRwanda Military Hospital, Kigali, Rwanda

eDepartment of Paediatrics and Adolescent Health, University of Botswana, Princess Marina Hospital, Gaborone, Botswana

fDepartment of Paediatric and Child Health Muhimbili National Hospital, Dar es salaam, Tanzania

gAga Khan Hospital, Nairobi, Kenya

hInternational Diabetes Federation Life for a Child Program, Glebe, NSW 2037, Australia

**Supplementary figure 1**

Relationship between the Gross National Income (GNI) in countries of the WHO African Region and the number of medicines deemed essential in pediatric endocrinology that are included in the EML for each country. Data are available for 42 countries (listed in Table 1). The maximum number of medicines or categories of medicines corresponds to those shown in Table 2 (n = 29).

r2= 0.019; p=0.38

**Supplementary table 1**

Lists of the medicines commonly used in pediatric endocrinology and diabetes that are included in the national EMLs for the 42 individual African countries for which a list was available. Supplementary Table 1 is divided into specific therapeutic areas of pediatric endocrinology and diabetes (Supplementary table 1A: Adrenals; 1B: Thyroid; 1C: Diabetes; 1D: Gonads; 1E: Bone/Calcium and Water Metabolism; 1F: Hypoglycemia and Growth).
